# Supplementary material
Source: PubMed Central journal article supplement (PMC2494931)
Supplement: M801332200_1.pdf [file M801332200_1.pdf]

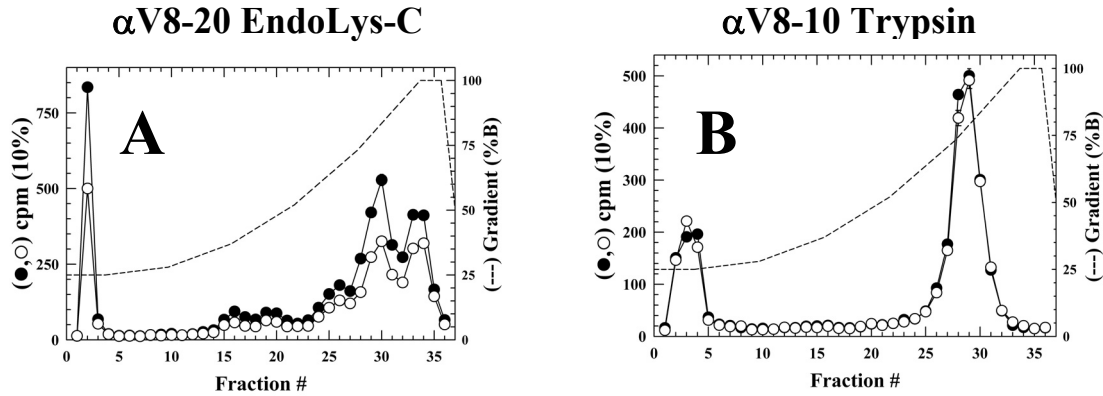

**Supplemental Figure S1. Isolation of [<sup>3</sup>H]TDBzl-Etomidate-labeled  $\alpha$ M2 and  $\alpha$ M4 by reversed-phase HPLC fractionation of EndoLys-C digests of  $\alpha$ V8-20 (A) and trypsin digests of  $\alpha$ V8-10 (B).** The  $\alpha$  subunits were isolated from nAChR-rich membranes photolabeled with 1  $\mu$ M [<sup>3</sup>H]TDBzl-Etomidate in the absence (●) or presence (○) of 0.1 mM tetracaine. V8 protease digests of the  $\alpha$  subunits were fractionated by SDS-PAGE (Experimental Procedures), visualized by Coomassie blue stain, and material was eluted from the gel bands containing  $\alpha$ V8-20 and  $\alpha$ V8-10. Digests were fractionated by reversed-phase HPLC. 10 % of each fraction was assayed for <sup>3</sup>H (●, ○), and also plotted as dashed lines are the HPLC gradients in percent solvent B (organic phase). **A**, Fractionation of EndoLys-C digests of the  $\alpha$ V8-20 samples (–tetracaine, 56,000 cpm injected, 85 % recovered; +tetracaine, 27,000 injected, 118 % recovered). Sequence analysis of the pools of fractions 33 & 34 (20% of recovered <sup>3</sup>H), which contained a fragment beginning at the N-terminus of  $\alpha$ M2 ( $\alpha$ Met-249), are shown in Figure 5A. **B**, Fractionation of trypsin digests of  $\alpha$ V8-10 (–tetracaine, 26,000 cpm injected, 91 % recovered; +tetracaine, 24,000 injected, 95 % recovered). Sequence analysis of the pools of fractions 28-30 (80 % organic, ~51 % of recovered <sup>3</sup>H) identified  $\alpha$ Tyr-401 (1.5 pmol in each sample), consistent with the sequencing data in Figure 8 from a different preparative labeling.

## EndoLys-C Digest of $\delta$ subunit

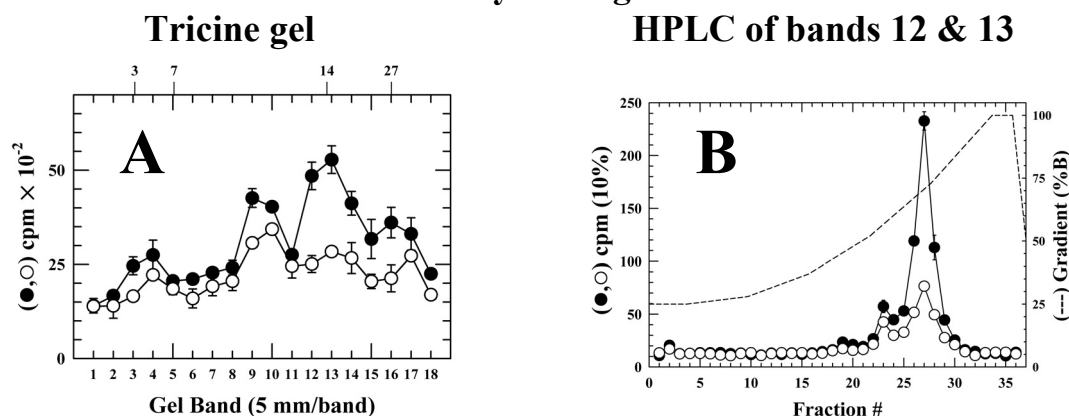

**Supplemental Figure S2: Fractionation of EndoLys-C digests of [<sup>3</sup>H]TDBzl-Etomidate-labeled  $\delta$  subunit by Tricine-SDS PAGE (A) and purification by reversed-phase HPLC of the fragments beginning at  $\delta$ Met-257 ( $\delta$ M2) and  $\delta$ Phe-206 ( $\delta$ M1)..**  $\delta$  subunits isolated from the same labeling described in Supplemental Figure S1 were digested with EndoLys-C, and the digests were fractionated by Tricine SDS-PAGE. **A**, The distribution of <sup>3</sup>H eluted from 5 mm bands of each lane of the gel (1% counted, ●, -tetracaine, 52,500 cpm digested, 32,000 cpm recovered; ○, +tetracaine, 36,700 cpm digested, 21,600 cpm recovered). The mobilities of the molecular mass markers are denoted above the graph. **B**, Reversed-phase HPLC fractionation of the material eluted from gel bands 12 and 13 (~12-14 kDa) (●, -tetracaine, 7,730 cpm injected, 87 % recovered; ○, +tetracaine, 3,100 injected, 91 % recovered). The HPLC gradient in percent solvent B (organic phase) is plotted as a dashed line (---). Sequence analysis of the pools of fractions 26-28 (70% organic, ~60 % of recovered <sup>3</sup>H), which contained a fragment beginning at the N-terminus of  $\delta$ M2, are shown in Figure 5C. Sequence analysis of the pools of fractions 22 and 23 identified a fragment beginning at  $\delta$ Phe-206 (7 pmol) that extended through  $\delta$ M1.

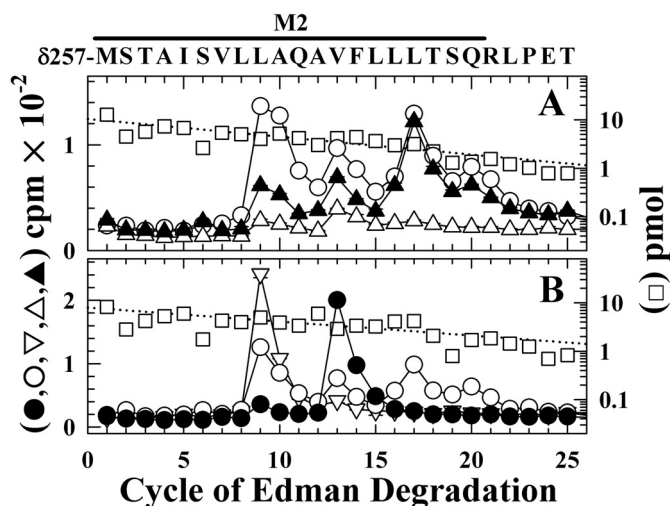

**Supplemental Figure S3. [<sup>3</sup>H]TDBzl-Etomidate labeling within the  $\delta$ M2 in the presence of PCP or proadifen.** <sup>3</sup>H (○, ▲, △, ▽, ●) and PTH-amino acids (□) released during sequencing of  $\delta$  subunit fragments beginning at the N-terminus of  $\delta$ M2. The primary amino acid sequence is shown above the top panel. **A**, From the photolabeling experiment of Figures 6A and B, the fragments beginning at  $\delta$ Met-257 were purified by Tricine-gel SDS-PAGE and reversed phase HPLC from EndoLys-C digests of  $\delta$  subunits from nAChRs photolabeled +Carb (○, □,  $I_0 = 10$  pmol), +Carb+PCP (▲,  $I_0 = 20$  pmol), and +PCP (△,  $I_0 = 12$  pmol). For nAChRs labeled +Carb, the <sup>3</sup>H releases in cycles 9, 13, 16, 17 and 20 indicated labeling (in cpm/pmol) of  $\delta$ Leu-265 (5),  $\delta$ Val-269 (3),  $\delta$ Leu-272 (2),  $\delta$ Leu-273 (6), and  $\delta$ Gln-276 (2), which for the sample +Carb +PCP was reduced by 80% and 70% at  $\delta$ Leu-265 (0.8 cpm/pmol), and  $\delta$ Val-269 (0.9 cpm/pmol), and by ~50% at  $\delta$ Leu-273 (3.1 cpm/pmol) and  $\delta$ Gln-276 (1 cpm/pmol). For nAChRs labeled +PCP,  $\delta$ Leu-265 (0.6 cpm/pmol) and  $\delta$ Val-269 (1.3 cpm/pmol) were labeled at similar efficiencies as for those labeled +Carb+PCP. **B**, From the photolabeling of Fig. 5 D, the fragments beginning at  $\delta$ Met-257 were isolated from the nAChRs photolabeled in the absence of any ligand (●), + proadifen (▽) or +Carb (○). The  $I_0$  for the primary sequences of each sample was between 8 – 9 pmol. For nAChRs labeled in the absence of other drugs, the primary release of <sup>3</sup>H was at cycle 13, corresponding to labeling of  $\delta$ Val-269 at 13 cpm/pmol, and that labeling was reduced by > 95% in the presence of proadifen. In contrast, in the presence of proadifen, the major peak of <sup>3</sup>H release was in cycle 9, corresponding to labeling of  $\delta$ Leu265 (10 cpm/pmol) at ~10-fold higher efficiency than in the control (1 cpm/pmol). The preferential photolabeling of  $\delta$ M2-9 +proadifen was distinct from that seen +Carb (○), with labeling of  $\delta$ M2 -9, -13, -16, -17, and -20.

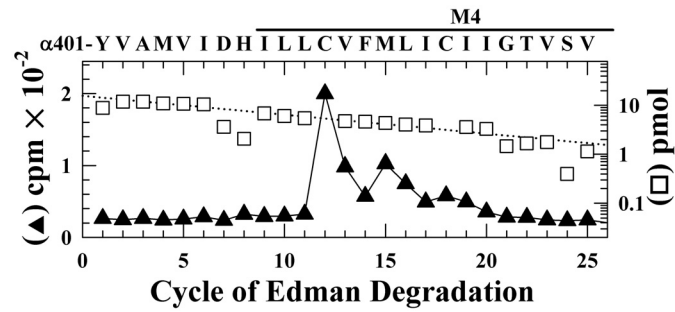

**Supplemental Figure S4. [<sup>3</sup>H]TDBzl-Etomidate photolabeling within  $\alpha$ M4.** <sup>3</sup>H (▲) and PTH-amino acids (□) released during sequencing of fragments isolated from trypsin digests of  $\alpha$ V8-10, isolated by reversed phase HPLC from nAChRs photolabeled +Carb +PCP as described in Figure 6A. The only sequence detected began at  $\alpha$ Tyr-401 ( $I_0 = 15$  pmol), and the peaks of <sup>3</sup>H release in cycles 12 and 13 indicate labeling within  $\alpha$ M4 of  $\alpha$ Cys-412 and  $\alpha$ Met-415 at 7 and 5 cpm/pmol.

Supplemental Figure S5. Stereo representations of the TDBzl-Etomidate binding pocket at the  $\gamma$ - $\alpha$  interface in the nAChR transmembrane domain (see next page for Figure Legend).

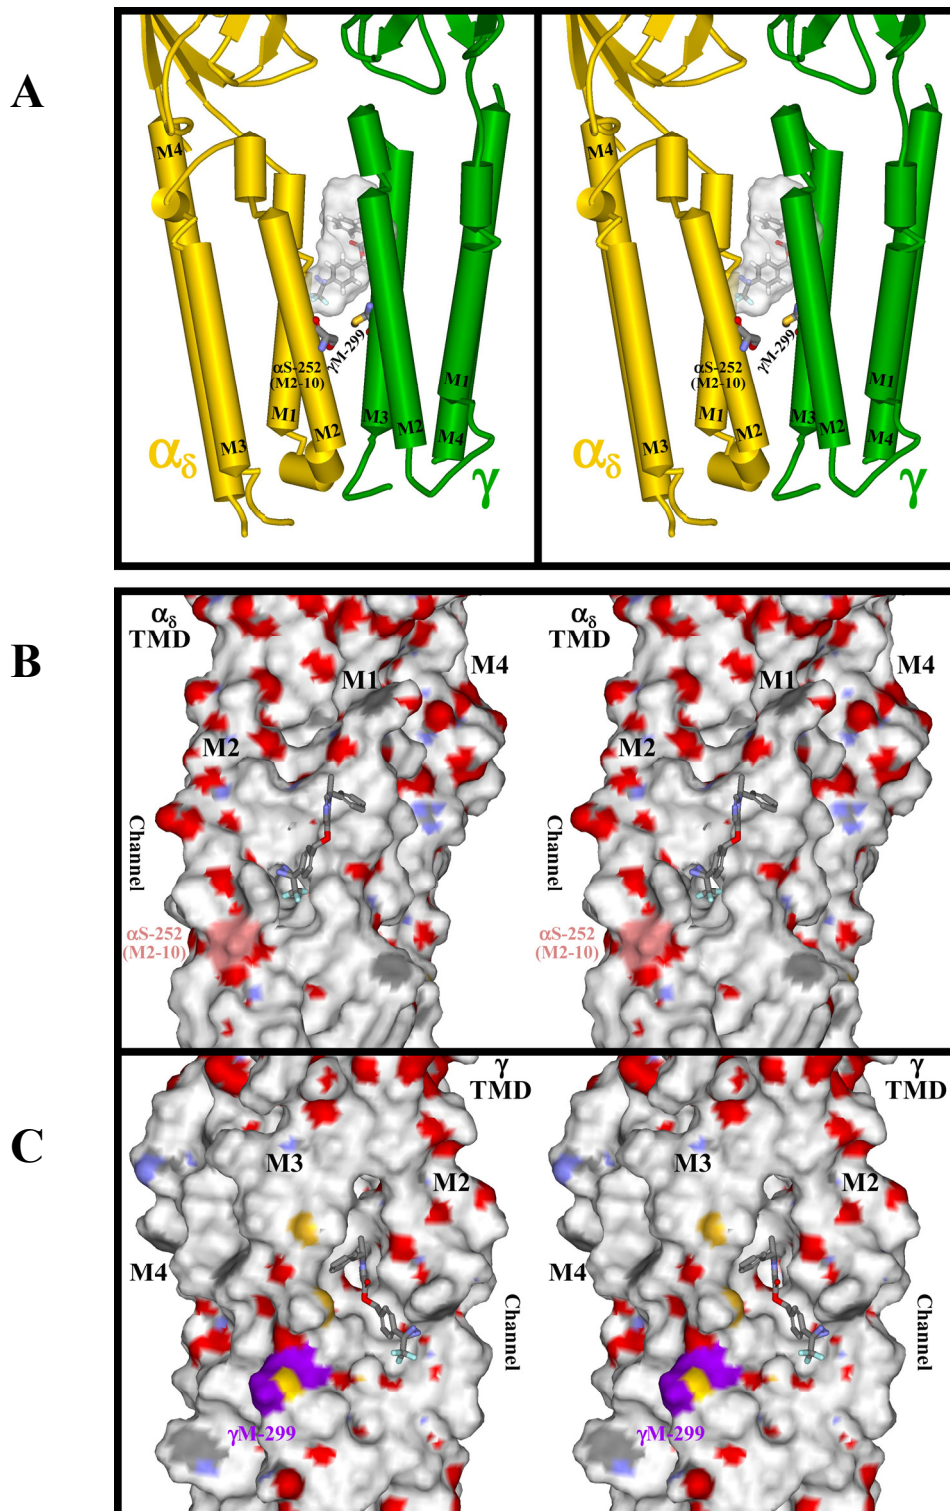

**Supplemental Figure S5: Stereo representations of TDBzl-Etomidate binding pocket at the  $\gamma$ - $\alpha$  interface in the nAChR transmembrane domain.** Expanded views are presented of portions of the *T. californica* nAChR homology model (Figure 8,  $\alpha$  (gold),  $\gamma$  (green)).

**A**, A view of the transmembrane helical bundles (shown as cylinders) of the  $\alpha$  and  $\gamma$  subunits with the volumes defined by 10 docked TDBzl-Etomidates in the pocket between the  $\gamma$  and  $\alpha$  subunits shown as a Connolly surface representation (white). Also included in stick format are the photolabeled residues and a TDBzl-Etomidate molecule docked in its lowest energy orientation (Experimental Procedures).

**B & C**, Stereo images of the  $\alpha$  (**B**) and  $\gamma$  (**C**) transmembrane helical bundles, viewed as Connolly surface representations from the  $\gamma$ - $\alpha$  interface. The images illustrate each subunit's contribution to the TDBzl-Etomidate binding pocket, which is identified by a TDBzl-Etomidate docked in its lowest energy orientation. The surface exposures of  $\alpha$ Ser-252 (pink, in **B**) and  $\gamma$ Met-299 (purple, in **C**) are also shown. Otherwise, color-coding represents atom type: H, white; C, gray; O, red; N, blue; and S, yellow. For orientation, the visible helices are denoted, as is the relative location of the ion channel in each figure.

**Supplemental Figure S6. Stereo representations of TDBzl-Etomidate binding sites in the nAChR transmembrane domain.** Expanded views are presented of portions of the *T. californica* nAChR homology model (Figure 8,  $\alpha$  (gold),  $\beta$  (blue),  $\gamma$  (green);  $\delta$  (magenta)).

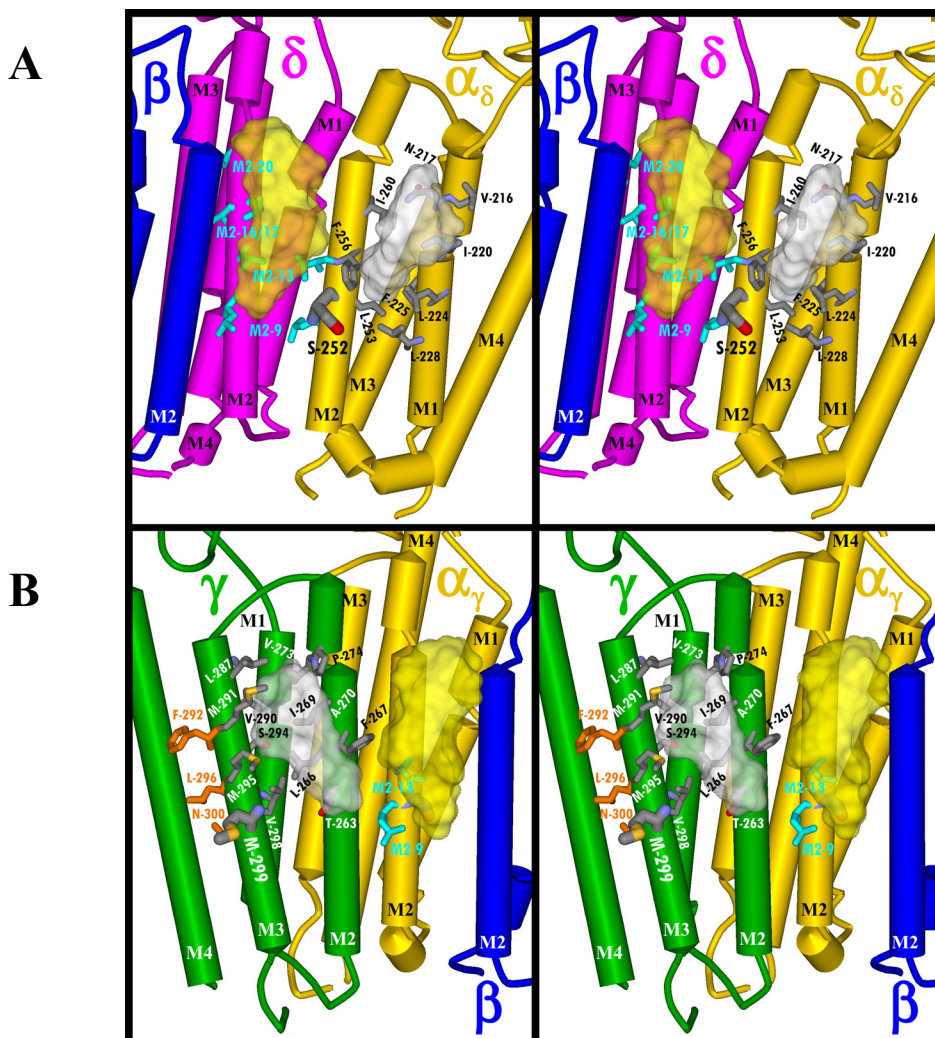

**A**, A view from the  $\gamma$  subunit towards the  $\alpha_\delta$  subunit TMD, with the amino acids of  $\alpha\text{M1}$  and  $\alpha\text{M2}$  shown in stick format that can contribute to the binding pocket at the  $\gamma$ - $\alpha$  interface (shown in white). **B**, A view from the  $\alpha_\delta$  subunit towards the  $\gamma$  subunit TMD, with the amino acids of  $\gamma\text{M2}$  and  $\gamma\text{M3}$  shown in stick format that can contribute to the binding pocket at the  $\gamma$ - $\alpha_\delta$  interface (shown in white). Also shown in cyan are the residues of the  $\alpha$  and  $\delta$  subunits in the lumen of the ion channel that were labeled by TDBzl-Etomidate. The volumes of the ensemble of 10 TDBzl-Etomidates docked within the channel lumen (yellow, volume  $900 \text{ \AA}^3$ ) or the  $\gamma$ - $\alpha$  interface (white, volume  $580 \text{ \AA}^3$ ) are shown in Connolly surface representations. Residues labeled by  $[^{125}\text{I}]\text{TID}$  from the protein-lipid interface ( $\gamma\text{Phe-292}$ ,  $\gamma\text{Leu-296}$ , and  $\gamma\text{Asn-300}$ ) are shown in orange (Blanton and Cohen, *Biochemistry* 33: 2859 (1994)). Within  $\gamma\text{M3}$ ,  $\gamma\text{Met-291}$  and  $\gamma\text{Met-295}$ , which were not labeled by  $[^3\text{H}]\text{TDBzl-Etomidate}$ , project towards the interface pocket. Those residues were also not labeled by  $[^{125}\text{I}]\text{TID}$  from the protein-lipid interface.
